# Supplementary material for: PrEggNut Study: protocol for a randomised controlled trial investigating the effect of a maternal diet rich in eggs and peanuts from <23 weeks’ gestation during pregnancy to 4 months’ lactation on infant IgE-mediated egg and peanut allergy outcomes
Source: HighWire-hosted journal article supplement (doi:10.1136/bmjopen-2021-056925), 2022-06-01
Supplement: bmjopen-2021-056925supp001_data_supplement.pdf [file bmjopen-2021-056925supp001_data_supplement.pdf]

To encourage compliance and monitor dietary group adherence, participants complete the following four-questions each month during the intervention period.

Thinking about the last week (7 days) how much of the following have you eaten:

- Eggs (boiled, fried, scrambled, poached, as an omelette or egg on hamburger/sandwich)?  
 no egg    1 egg    2 eggs    3 eggs    4 eggs    5 eggs    6 eggs    7 or more eggs.
- Serves of any of these egg containing foods: frittata, quiche or french toast?  
 no serves    1 serve    2 serves    3 serves    4 serves    5 serves    6 serves    7 serves  
 8 serves    9 serves    10 or more serves
- Peanuts (not including peanut butter)?  
 no peanuts    1-10 peanuts    11-20 peanuts    21-30 peanuts    31-40 peanuts  
 41-50 peanuts    51-60 peanuts    61-70 peanuts    71-80 peanuts  
 more than 80 peanuts
- Peanut butter?  
 no peanut butter    1 teaspoon peanut butter    2 teaspoons peanut butter  
 3 teaspoons peanut butter    4 teaspoons=1 tablespoon peanut butter  
 1 ½ tablespoons peanut butter    2 tablespoons of peanut butter  
 3 tablespoons of peanut butter    4 tablespoons of peanut butter  
 5 tablespoons peanut butter    6 tablespoons peanut butter  
 more than 6 tablespoons peanut butter
